# Supplementary material
Source: Springer Nature journal article supplement (https://www.springermedizin.de/resource/supplementary/12939_2010_210_MOESM7_ESM.pdf/9550606)

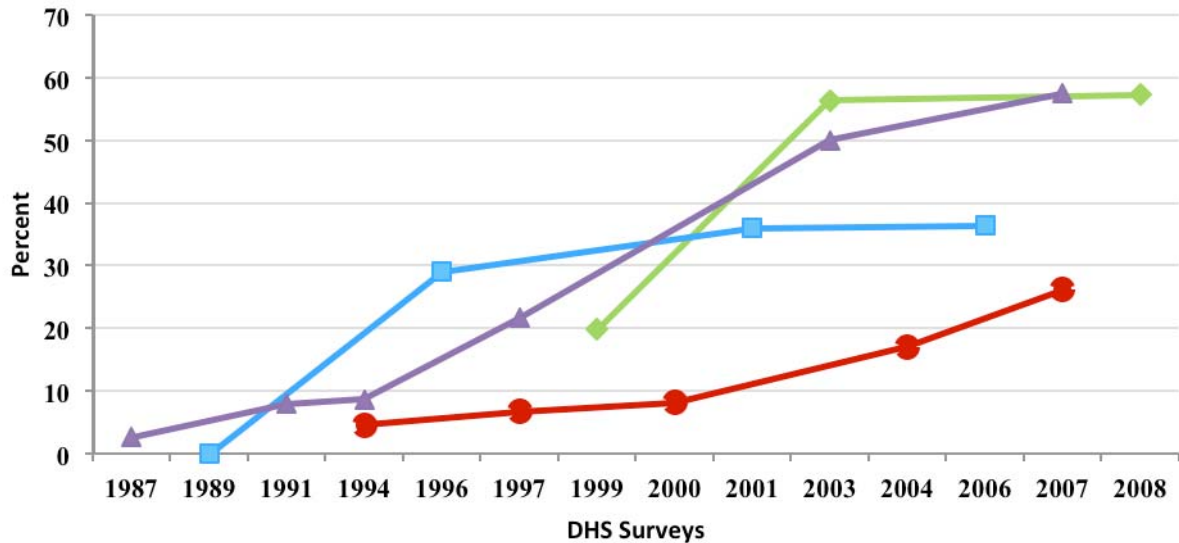

—◆— Nigeria

—■— Uganda

—●— Bangladesh

—▲— Indonesia

Supplement: MOESM7 [file 9550606]
